# Supplementary material for: Fabrication of methotrexate conjugated multi-walled carbon nanotubes for the evaluation of cytotoxic potential at biochemical and molecular level modulating BAX, BCL-2 and telomerase expression
Source: Royal Society of Chemistry journal article supplement (doi:10.1039/d5ra08838k), 2026-04-08
Supplement: d5ra08838k1.pdf [file d5ra08838k1.pdf]

## Supplementary Information

Fabrication of Methotrexate Conjugated Multi-Walled Carbon Nanotubes for the Evaluation of Cytotoxic Potential at Biochemical and Molecular Level Modulating *BAX*, *BCL-2* and Telomerase Expression

### Authors List

Harshita Tiwari<sup>1</sup>, Swati Singh<sup>1</sup>, Vandana Kumari<sup>1</sup>, Shikha Tripathi<sup>2</sup>, Anurag Kumar Singh<sup>3</sup>, Avanish Singh Parmar<sup>2</sup>, Santosh Kumar Singh<sup>1</sup>, Vibhav Gautam<sup>1\*</sup>

### Affiliations

<sup>1</sup>*Centre of Experimental Medicine and Surgery, Institute of Medical Sciences, Banaras Hindu University, Varanasi 221005, Uttar Pradesh, India*

<sup>2</sup>*Department of Physics, Indian Institute of Technology (BHU), Varanasi 221005, Uttar Pradesh, India*

<sup>3</sup>*Department of Pharmaceutical Engineering and Technology, Indian Institute of Technology (BHU), Varanasi 221005, Uttar Pradesh, India*

### \*Corresponding Authors

Dr. Vibhav Gautam

### Address

Centre of Experimental Medicine and Surgery

Institute of Medical Sciences

Banaras Hindu University, Varanasi-221005,

Uttar Pradesh, India

Email ID: [vibhav.gautam4@bhu.ac.in](mailto:vibhav.gautam4@bhu.ac.in)

Contact No. +918860182113

**Table S1: Quantification of vascular parameters of CAM assay**

| Concentration   | Time     | Vessel length (mm) | Branch Points | Junctions | Vessel Thickness (mm) |
|-----------------|----------|--------------------|---------------|-----------|-----------------------|
| Vehicle Control | 0 hour   | 42.3135±0.4055     | 68±0.5        | 40±1      | 1.809±0.575           |
|                 | 48 hours | 77.6675±2.3225     | 114±5.5       | 71±3      | 2.737±0.196           |
| 10 µg/mL        | 0 hour   | 48.2105±2.8325     | 60±4          | 26.5±1.5  | 1.843±0.077           |
|                 | 48 hours | 16.9245±0.7115     | 27±2          | 18±1      | 0.61±0.12             |

**Table S2: Tabular representation of sequences of gene-specific forward and reverse primers.**

| Genes        | Primer Sequence            |
|--------------|----------------------------|
| <i>18S</i>   | FP: GTAACCCGTTGAACCCATT    |
|              | RP: CCATCCAATCGGTAGTAGCG   |
| <i>BAX</i>   | FP: AGTAACATGGAGCTGCAGAG   |
|              | RP: AGTAGAAAAGGGCGACAACC   |
| <i>BCL-2</i> | FP: GGGTATGAAGGACCTGTATTGG |
|              | RP: CATGCTGATGTCTCTGGAATCT |

## **Figure Legends**

Figure S1- Dispersion and solubility analysis of r-MWCNTs, p-MWCNTs and c MWCNTs in aqueous medium to validate the carboxylation.

Figure S2- TEM images representing 2D morphology of p-MWCNT and MTX-MWCNT.

Figure S3- Cell viability (MTT) assay to determine the cytotoxicity of synthesized nanoconjugate in non-cancerous (HEK 293T) cells.

Figure S4- Standard curves for TAS and sandwich ELISA-based quantification of protein levels.

**Figure S1**

**A**

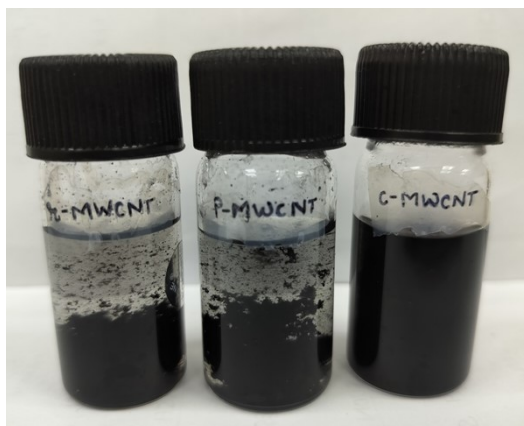

**0 hour**

**B**

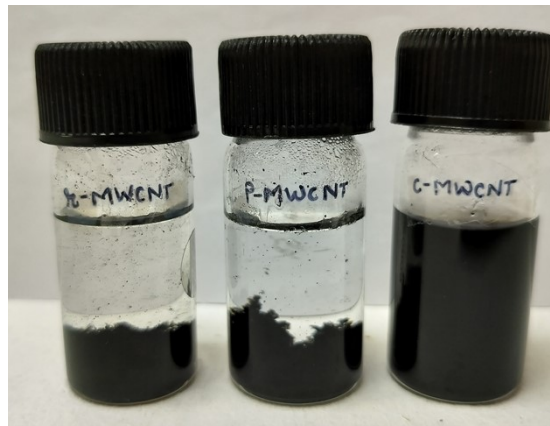

**1 day**

**C**

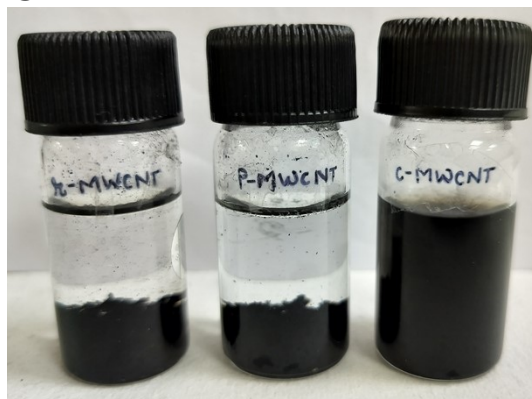

**7 days**

**D**

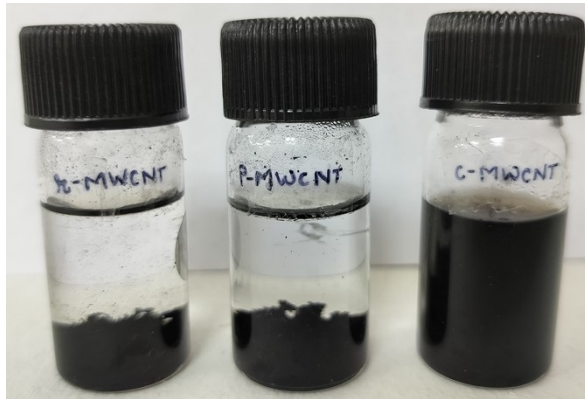

**30 days**

**Figure S1:** Dispersion and solubility analysis of r-MWCNTs, p-MWCNTs and c-MWCNTs in aqueous medium to validate the carboxylation. Visual observations were captured at **(A)** 0 hour, **(B)** 1 day, **(C)** 7 days and **(D)** 30 days to assess dispersion stability over time. The enhanced dispersion stability of c-MWCNTs compared to r-MWCNTs and p-MWCNTs confirms successful surface oxidation and introduction of carboxyl groups required for further conjugation.

**Figure S2**

**A**

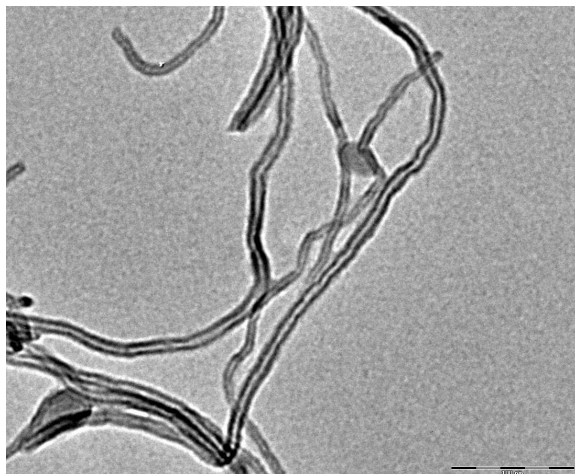

**B**

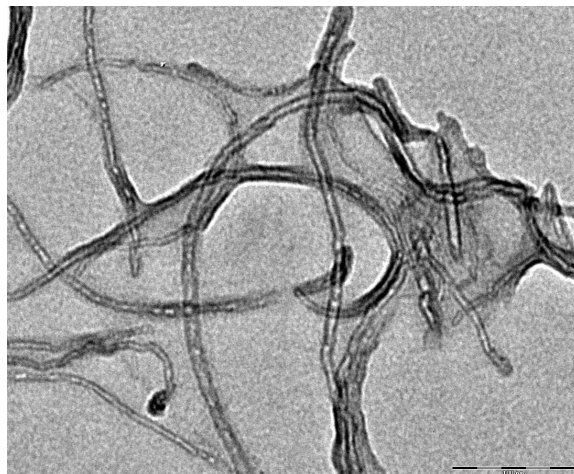

**Figure S2:** TEM images representing 2D morphology of p-MWCNT and MTX-MWCNT. p-MWCNT (**A**) show clear concentric graphene walls with hollow lumen while (**B**) MTX-MWCNT display roughened wall morphology consistent with drug attachment. Scale Bar- 100 nm

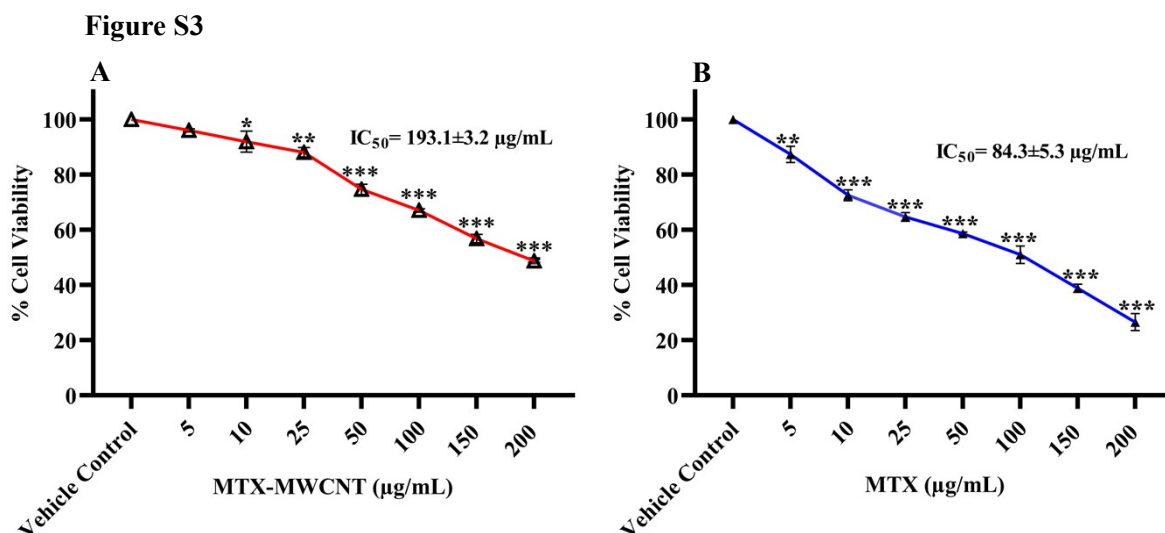

**Figure S3:** Cell viability (MTT) assay to determine the cytotoxicity of the synthesized nanoconjugate in non-cancerous (HEK 293T) cells. The % cell viability of **(A)** MTX-MWCNT and **(B)** MTX reveal that the synthesized nanoconjugate exhibited a significantly higher IC<sub>50</sub> value in HEK 293T cells compared to cancer cells, indicating lower cytotoxicity and good biocompatibility toward normal cells. Data are presented as mean ± SEM of experiment performed in triplicates, and statistical significance was determined by comparing the mean of treated groups with that of the vehicle control using one-way ANOVA followed by Dunnett's multiple comparison test (\*p<0.05, \*\*p< 0.01 and \*\*\*p<0.001)

**Figure S4**

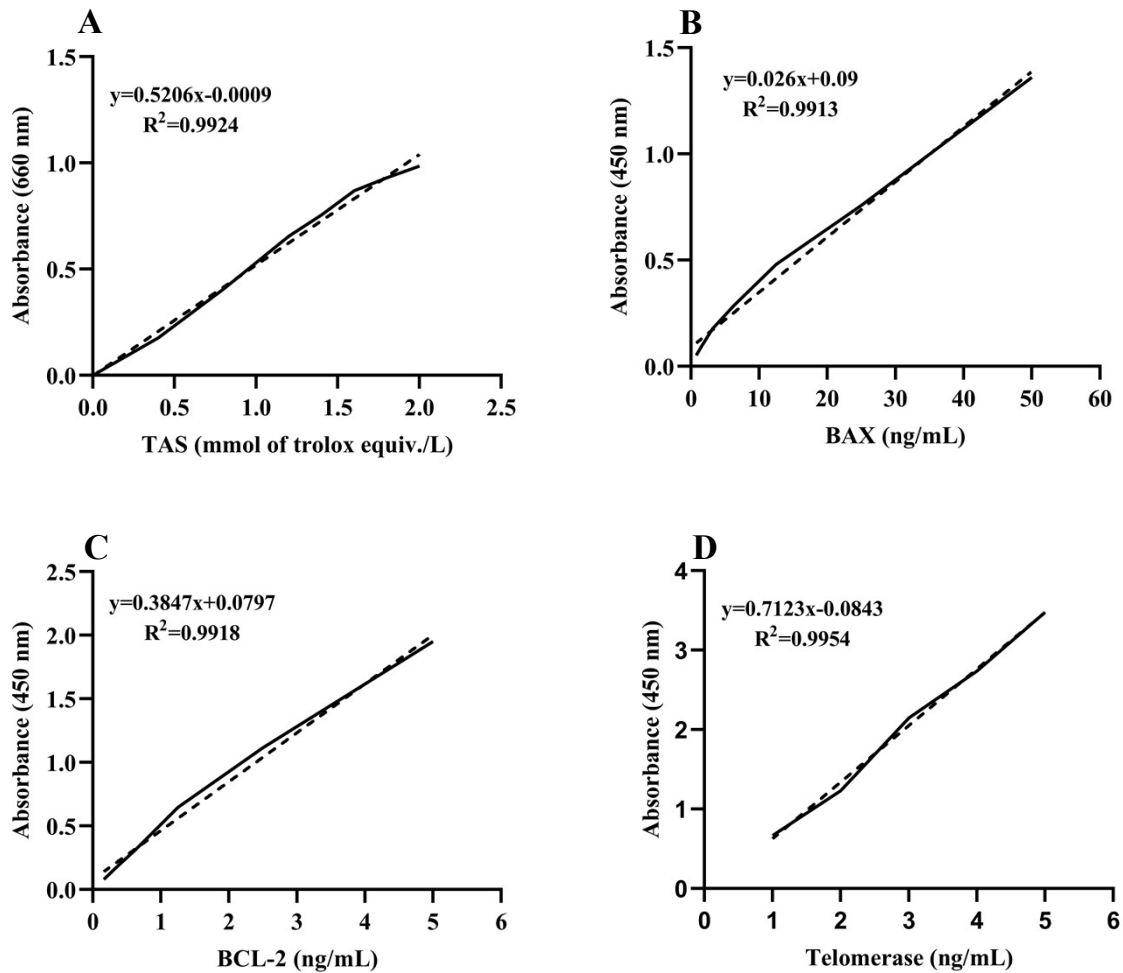

**Figure S4:** Standard curves for TAS and sandwich ELISA-based quantification of protein levels. The standard curve for (A) TAS was generated by plotting standard curve at 660 nm while for (B) BAX, (C) BCL-2, and (D) telomerase, the standard curve was generated by plotting absorbance at 450 nm (Y-axis) against known concentrations of respective standards (X-axis). Each data point represents the mean  $\pm$  SEM of triplicate measurements, and linear regression analysis ( $Y = mX + c$ ) was used to obtain the best-fit line and coefficient of determination ( $R^2$ ) values which indicates significant linearity of the generated curves.
